# Supplementary material
Source: Research Square preprint supplement (doi:10.21203/rs.3.rs-8864402/v1)
Supplement: Supplementary file 1 [file 6d5c377119596cfa0e4a81f6.docx]

**Supplementary Materials**

**Supplementary Table1** The Global Quality Score (GQS) quality criteria.

| **Item features** | **Points** |
| --- | --- |
| Poor quality; poor flow of the videos; most information missing; not at all useful for patients | 1 |
| Generally poor quality; some information listed, but many important topics missing; of very limited use to patients | 2 |
| Moderate quality; suboptimal flow; some important adequately discussed, but other information poorly discussed; somewhat useful for patients | 3 |
| Good quality and generally good flow; most of the relevant information listed, but some topics not covered; useful for patients | 4 |
| Excellent quality and flow; very useful for patients | 5 |

**Supplementary Table 2** The Modified DISCERN (mDISCERN) quality criteria.

| **Reliability Score** |
| --- |
| 1. Is the video clear, concise, and understandable? |
| 2. Are valid sources cited? |
| 3. Is the content presented balanced and unbiased? |
| 4. Are additional sources of content listed for patient reference? |
| 5. Are areas of uncertainty mentioned? |

* (1 point for answer ‘yes’, 0 point for answer ‘no’)

**Supplementary Table 3 Classification of Videos**

| Video Source | |
| --- | --- |
| 1. Professional Individuals | Individuals who have real name recognition and professional accreditation in medical area, including doctors, nurses and other healthcare professionals. |
| 1. None-professional Individuals | Individuals who do not have real name recognition or professional accreditation in medical area. |
| 1. Professional Institutions | Institutions who have professional accreditation in medical area, including hospitals, medical schools, medical centers and other healthcare institutions. |
| 1. None-professional Institutions | Institutions who do not have professional accreditation in medical area, including newspaper, TV station, network media and other none-professional groups. |
| Video Content | |
| 1. Disease definition | Description of venous thromboembolism (VTE) spectrum (pulmonary embolism and DVT), temporal classification (acute, subacute, chronic/CTEPH), or hemodynamic risk stratification (high-risk with shock/hypotension versus intermediate-/low-risk). |
| 1. Epidemiology | Information on incidence, mortality burden (e.g., third leading cardiovascular cause), high-risk clinical settings (postoperative state, malignancy, critical illness), or underdiagnosis. |
| 1. Pathological mechanisms | Including hemodynamic cascade (acute pulmonary hypertension, right ventricular dysfunction, septal shift), ventilation-perfusion mismatch, and cardiogenic shock pathophysiology. |
| 1. Diagnostic criteria | Mention of clinical prediction rules (Wells score, Geneva score), D-dimer testing (including age-adjusted thresholds), confirmatory imaging (CTPA, V/Q scanning, echocardiography), or lower extremity compression ultrasonography. |
| 1. Risk factors | Description of hereditary thrombophilia, major acquired risk factors (surgery, trauma, active cancer, pregnancy), immobilization, or validated risk assessment models (Caprini, Padua). |
| 1. Preventive strategies | Including basic prophylaxis, mechanical methods, and pharmacological agents with bleeding risk stratification. |
| 1. Therapeutic strategies | Discussion of treatment modalities, including anticoagulation (initial parenteral therapy followed by long-term oral agents), reperfusion therapies for high-risk PE (systemic thrombolysis, catheter-directed therapy, surgical embolectomy), or inferior vena cava (IVC) filter indications. |
| Preventive strategies | |
| 1. Basic prophylaxis | Including Comprehensive patient education, promotion of early ambulation, optimal selection of venous access sites, maintenance of fluid balance, and prevention of dehydration, etc. |
| 1. Mechanical prophylaxis | Including intermittent pneumatic compression, graduated compression stockings and venous foot pump. |
| 1. Pharmacological prophylaxis | Anticoagulant agents, such as low molecular weight heparins (LMWHs). |
